# Supplementary material for: A Combined Isolation and Formulation Approach to Convert Nanomilled Suspensions into High Drug-Loaded Composite Particles That Readily Reconstitute
Source: MDPI journal article supplement (doi:10.3390/powders1020008), 2022-05-03
Supplement: s1 [file s1]

# A Combined Isolation and Formulation Approach to Convert Nanomilled Suspensions into High Drug-Loaded Composite Particles That Readily Reconstitute

Alexander Coelho <sup>1,2</sup>, Luke Schenck <sup>2</sup>, Gulenay Guner <sup>1</sup>, Ashish Punia <sup>3</sup> and Ecevit Bilgili <sup>1,\*</sup>

<sup>1</sup> Department of Chemical and Materials Engineering, New Jersey Institute of Technology, Newark, NJ 07102, USA; alexander.coelho@merck.com (A.C.); gg357@njit.edu (G.G.)

<sup>2</sup> Process Research & Development, Merck & Co., Inc., Kenilworth, NJ 07033, USA; luke\_schenck@merck.com

<sup>3</sup> Analytical Research & Development, Merck & Co., Inc., Kenilworth, NJ 07033, USA; ashish.punia@merck.com

\* Correspondence: bilgece@njit.edu; Tel.: +1-973-596-2998

**Table S1.** Particle sizes of the nanosuspensions and the nanocomposites prepared via drying (with feed and bleed) followed by mortar-pestle milling.

| Suspension Formulation <sup>1</sup> | Particle Sizes in the Nanosuspensions |                                      |                                   | Nanocomposite Particle Sizes         |                                      |                                      |
|-------------------------------------|---------------------------------------|--------------------------------------|-----------------------------------|--------------------------------------|--------------------------------------|--------------------------------------|
|                                     | $D_{50} \pm SD$<br>( $\mu\text{m}$ )  | $D_{90} \pm SD$<br>( $\mu\text{m}$ ) | $Q (1 \mu\text{m}) \pm SD$<br>(%) | $D_{50} \pm SD$<br>( $\mu\text{m}$ ) | $D_{90} \pm SD$<br>( $\mu\text{m}$ ) | $D_{vm} \pm SD$<br>( $\mu\text{m}$ ) |
| 2.5%HPC-SL                          | 0.135 $\pm$ 0.00                      | 0.345 $\pm$ 0.00                     | 99.93 $\pm$ 0.00                  | 66.5 $\pm$ 4.7                       | 186.9 $\pm$ 18.6                     | 85.6 $\pm$ 8.0                       |
| 5%HPC-SL                            | 0.143 $\pm$ 0.00                      | 0.379 $\pm$ 0.01                     | 98.65 $\pm$ 0.02                  | 222.4 $\pm$ 22.8                     | 608.0 $\pm$ 73.2                     | 279.0 $\pm$ 30.9                     |
| 7.5%HPC-SL                          | 0.148 $\pm$ 0.00                      | 0.405 $\pm$ 0.01                     | 99.06 $\pm$ 0.03                  | 122.0 $\pm$ 4.1                      | 329.0 $\pm$ 8.2                      | 151.9 $\pm$ 4.1                      |
| 10%HPC-SL                           | 0.152 $\pm$ 0.00                      | 0.414 $\pm$ 0.02                     | 99.63 $\pm$ 0.53                  | 287.7 $\pm$ 57.2                     | 679.8 $\pm$ 49.0                     | 335.2 $\pm$ 43.9                     |
| 2.5%HPC-SL/ 2.5%PVP K30             | 0.133 $\pm$ 0.01                      | 0.328 $\pm$ 0.02                     | 100 $\pm$ 0.00                    | 122.3 $\pm$ 6.5                      | 355.9 $\pm$ 9.4                      | 157.8 $\pm$ 5.5                      |
| 2.5%HPC-SL/ 5%PVP K30               | 0.139 $\pm$ 0.00                      | 0.346 $\pm$ 0.00                     | 100 $\pm$ 0.00                    | 109.6 $\pm$ 12.9                     | 354.3 $\pm$ 30.2                     | 146.5 $\pm$ 10.6                     |
| 2.5%HPC-SL/ 7.5%PVP K30             | 0.145 $\pm$ 0.01                      | 0.383 $\pm$ 0.03                     | 99.16 $\pm$ 0.49                  | 108.7 $\pm$ 2.9                      | 395.0 $\pm$ 9.9                      | 161.3 $\pm$ 1.3                      |
| 2.5%HPC-SL/ 2.5%PEG 3350            | 0.130 $\pm$ 0.00                      | 0.322 $\pm$ 0.01                     | 100 $\pm$ 0.00                    | 127.4 $\pm$ 5.7                      | 349.5 $\pm$ 3.7                      | 160.1 $\pm$ 4.1                      |
| 2.5%HPC-SL/ 5%PEG 3350              | 0.133 $\pm$ 0.00                      | 0.336 $\pm$ 0.00                     | 100 $\pm$ 0.00                    | 157.1 $\pm$ 10.6                     | 386.8 $\pm$ 30.2                     | 185.4 $\pm$ 13.6                     |
| 2.5%HPC-SL/ 7.5%PEG 3350            | 0.146 $\pm$ 0.01                      | 0.379 $\pm$ 0.03                     | 99.29 $\pm$ 0.62                  | 133.1 $\pm$ 10.5                     | 417.2 $\pm$ 30.6                     | 181.7 $\pm$ 13.6                     |
| 2.5%HPC-SL/ 2.5%VA 64               | 0.138 $\pm$ 0.01                      | 0.385 $\pm$ 0.08                     | 98.01 $\pm$ 2.19                  | 100.4 $\pm$ 14.1                     | 302.2 $\pm$ 20.6                     | 133.1 $\pm$ 12.0                     |
| 2.5%HPC-SL/ 5%VA 64                 | 0.134 $\pm$ 0.00                      | 0.334 $\pm$ 0.00                     | 100 $\pm$ 0.00                    | 134 $\pm$ 6.6                        | 339 $\pm$ 24.9                       | 167 $\pm$ 5.5                        |
| 2.5%HPC-SL/ 7.5%VA 64               | 0.137 $\pm$ 0.00                      | 0.351 $\pm$ 0.00                     | 99.98 $\pm$ 0.03                  | 87.5 $\pm$ 3.0                       | 304.9 $\pm$ 7.9                      | 126.5 $\pm$ 3.1                      |
| 2.5%HPC-SL/ 0.7%F-127               | 0.137 $\pm$ 0.00                      | 0.342 $\pm$ 0.01                     | 100 $\pm$ 0.00                    | 62.0 $\pm$ 8.9                       | 213.9 $\pm$ 28.7                     | 92.0 $\pm$ 12.7                      |
| 2.5%HPC-SL/ 2.5%F-127               | 0.132 $\pm$ 0.01                      | 0.325 $\pm$ 0.02                     | 100 $\pm$ 0.00                    | 136.4 $\pm$ 9.0                      | 375.7 $\pm$ 5.7                      | 172.9 $\pm$ 4.5                      |
| 2.5%HPC-SL/ 5%F-127                 | 0.136 $\pm$ 0.00                      | 0.337 $\pm$ 0.00                     | 100 $\pm$ 0.00                    | 108.1 $\pm$ 10.4                     | 341.4 $\pm$ 21.7                     | 149.8 $\pm$ 11.4                     |

<sup>1</sup>All suspensions have 10% ITZ and 0.2% SDS. % w/w is with respect to the weight of deionized water (300 g).

**Table S2.** Particle sizes of the nanocomposites prepared via drying (with feed and bleed) followed by mortar–pestle milling and particle sizes upon aqueous redispersion.

| Formulation <sup>1</sup> | Nanocomposite Particle Sizes |                             | Redispersed Particle Sizes <sup>2</sup> |                             |                    |
|--------------------------|------------------------------|-----------------------------|-----------------------------------------|-----------------------------|--------------------|
|                          | D <sub>50</sub> ±SD<br>(µm)  | D <sub>90</sub> ±SD<br>(µm) | D <sub>50</sub> ±SD<br>(µm)             | D <sub>90</sub> ±SD<br>(µm) | Q (1 µm)±SD<br>(%) |
| 2.5%HPC-SL               | 66.5± 4.7                    | 187±18.6                    | 5.62±0.67                               | 32±1.03                     | 22.9±3.01          |
| 5%HPC-SL                 | 222±22.8                     | 608±73.2                    | 0.367±0.00                              | 26.5±1.15                   | 66±0.44            |
| 7.5%HPC-SL               | 122±4.1                      | 329±8.2                     | 0.326±0.01                              | 15.32±0.80                  | 68.4±1.34          |
| 10%HPC-SL                | 288±57.2                     | 680±49.0                    | 0.238±0.01                              | 6.54±0.51                   | 85.92±0.35         |
| 2.5%HPC-SL/ 2.5%PVP K30  | 122±6.5                      | 356±9.4                     | 0.474±0.06                              | 19.07±1.39                  | 58.11±3.15         |
| 2.5%HPC-SL/ 5%PVP K30    | 110±12.9                     | 354±30.2                    | 0.374±0.02                              | 15.27±0.84                  | 63.24±1.84         |
| 2.5%HPC-SL/ 7.5%PVP K30  | 109±2.9                      | 395±9.9                     | 0.323±0.00                              | 14.90±0.45                  | 69.89±0.42         |
| 2.5%HPC-SL/ 2.5%PEG 3350 | 127±5.7                      | 350±3.7                     | 0.812±0.15                              | 17.87±1.34                  | 51.88±1.72         |
| 2.5%HPC-SL/ 5%PEG 3350   | 157±10.6                     | 387±30.2                    | 0.386±0.01                              | 6.31±0.73                   | 74.35±1.53         |
| 2.5%HPC-SL/ 7.5%PEG 3350 | 133±10.5                     | 417±30.6                    | 0.306±0.00                              | 4.33±0.05                   | 81.66±0.14         |
| 2.5%HPC-SL/ 2.5%VA 64    | 100±14.1                     | 302±20.6                    | 2.58±0.09                               | 23.30±4.06                  | 43.05±0.94         |
| 2.5%HPC-SL/ 5%VA 64      | 134±6.6                      | 339±24.9                    | 2.637±0.16                              | 21.10±2.21                  | 40.62±1.52         |
| 2.5%HPC-SL/ 7.5%VA 64    | 87.5±3.0                     | 305±7.9                     | 3.06±0.04                               | 15.73±0.63                  | 33.42±0.50         |
| 2.5%HPC-SL/ 0.7%F-127    | 62.0±8.9                     | 214±28.7                    | 0.259±0.00                              | 4.74±0.13                   | 83.16±0.43         |
| 2.5%HPC-SL/ 2.5%F-127    | 136±9.0                      | 376±5.7                     | 0.141±0.00                              | 0.394±0.02                  | 98.76±0.54         |
| 2.5%HPC-SL/ 5%F-127      | 108±10.4                     | 341±21.7                    | 0.145±0.00                              | 0.393±0.01                  | 98.48±0.07         |

<sup>1</sup>All precursor suspensions of the nanocomposites have 10% ITZ and 0.2% SDS. % w/w is with respect to the weight of deionized water (300 g).

<sup>2</sup>Particle size was measured at the end of 30 min aq. redispersion.
